# Supplementary material for: Investigation on the photoconductivity of polyoxometalates
Source: Royal Society of Chemistry journal article supplement (doi:10.1039/c6ra15544h), 2016-01-01
Supplement: c6ra15544h1.pdf [file c6ra15544h1.pdf]

## Supporting Information

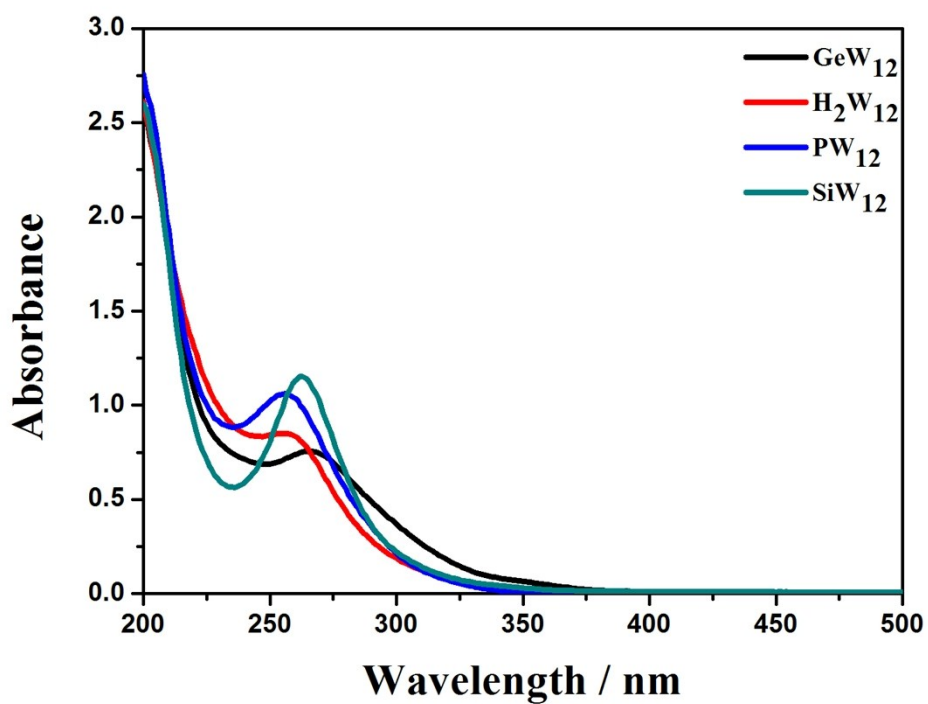

Fig. S1. UV-vis adsorption spectra of four POMs

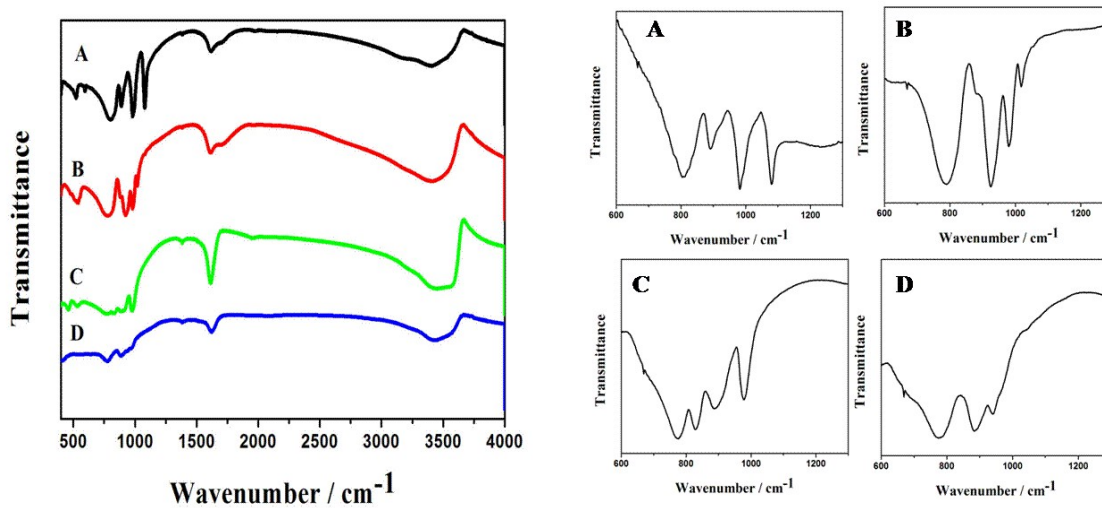

Fig. S2. IR spectra of PW<sub>12</sub> (A), SiW<sub>12</sub> (B), GeW<sub>12</sub> (C) and H<sub>2</sub>W<sub>12</sub> (D).

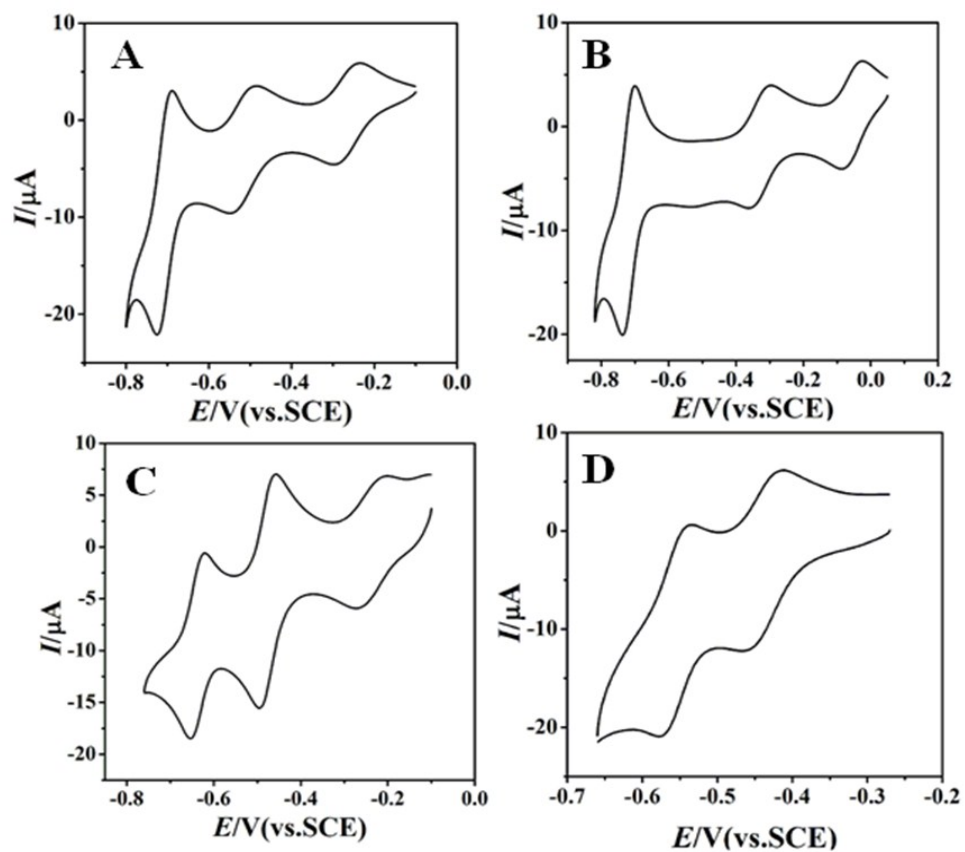

Fig. S3. Cyclic voltammogram of SiW<sub>12</sub> (A), PW<sub>12</sub> (B), GeW<sub>12</sub>(C) and H<sub>2</sub>W<sub>12</sub>(D).

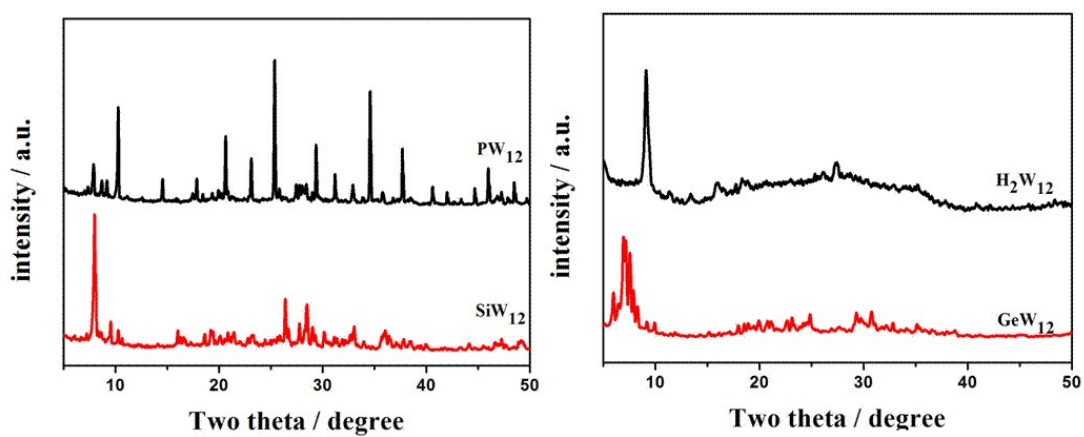

Fig. S4. The XRD patterns of four POMs.

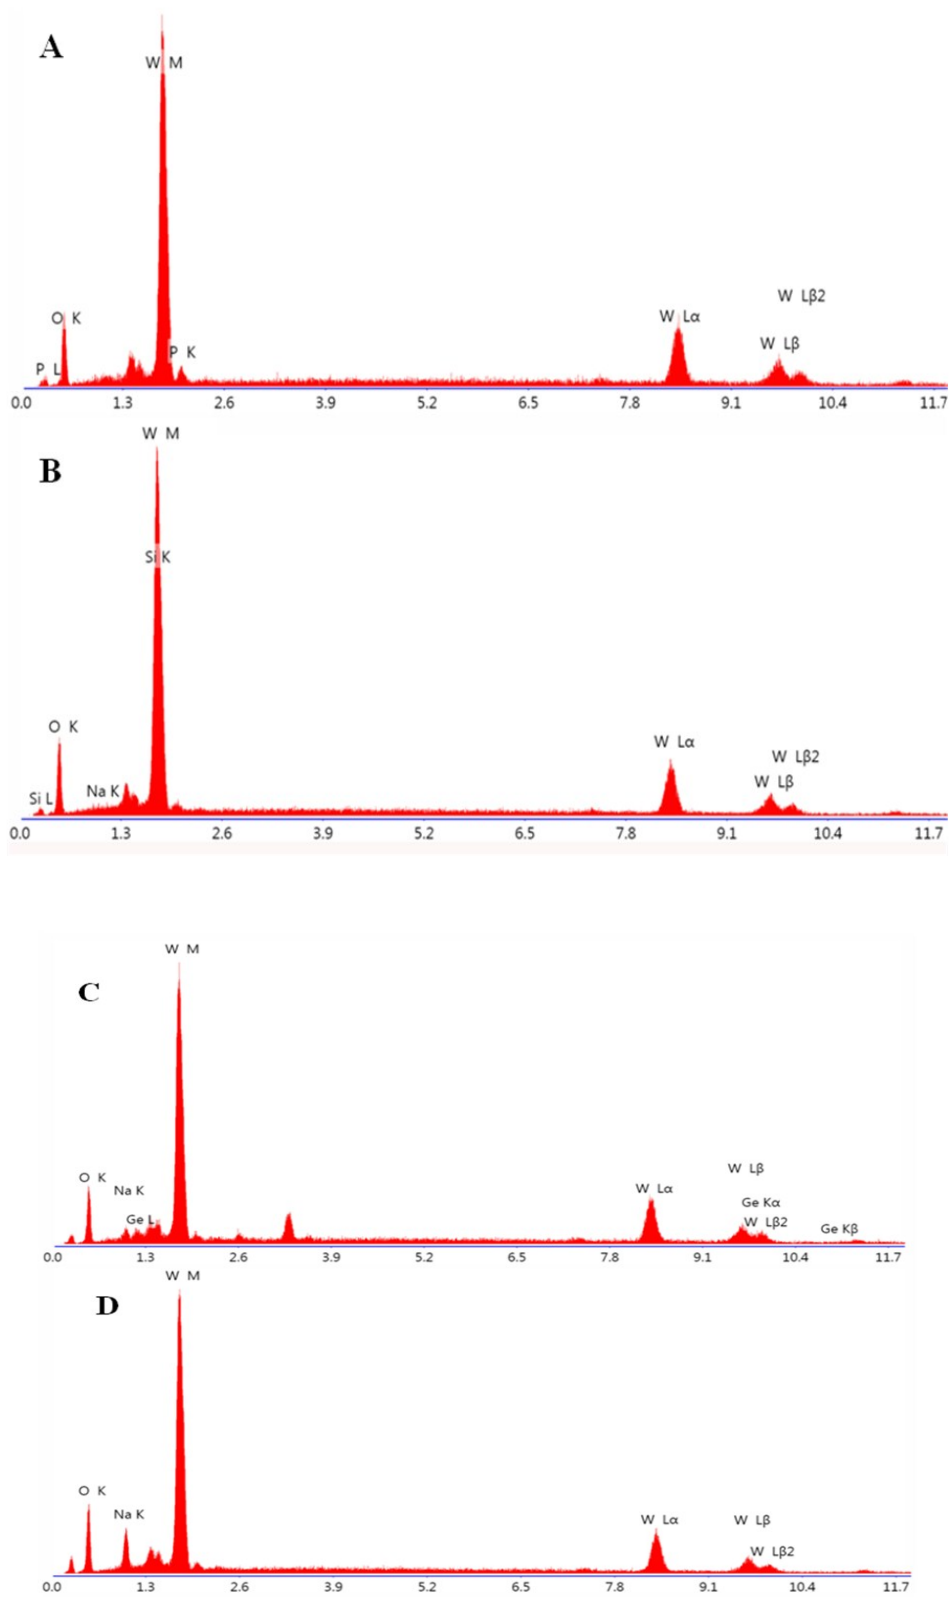

**Fig. S5.** EDX diagrams of PW<sub>12</sub> (A), SiW<sub>12</sub> (B), GeW<sub>12</sub> (C) and H<sub>2</sub>W<sub>12</sub>(D).

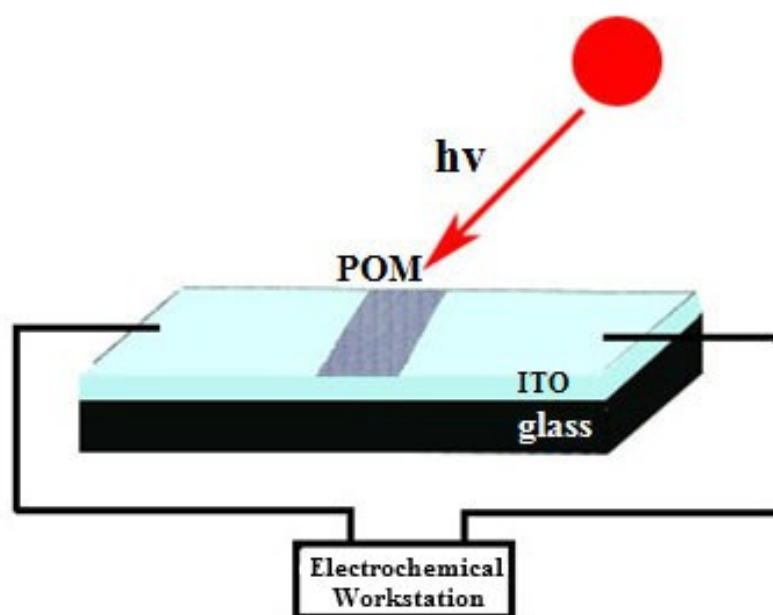

**Fig. S6.** Schematics of the device structure

**Table S1** The  $E_g$  values of Keggin-type tungsten-series POMs

| POM        | $PW_{12}$ | $SiW_{12}$ | $GeW_{12}$ | $H_2W_{12}$ |
|------------|-----------|------------|------------|-------------|
| $E_g$ (eV) | 3.32      | 3.12       | 2.93       | 3.14        |

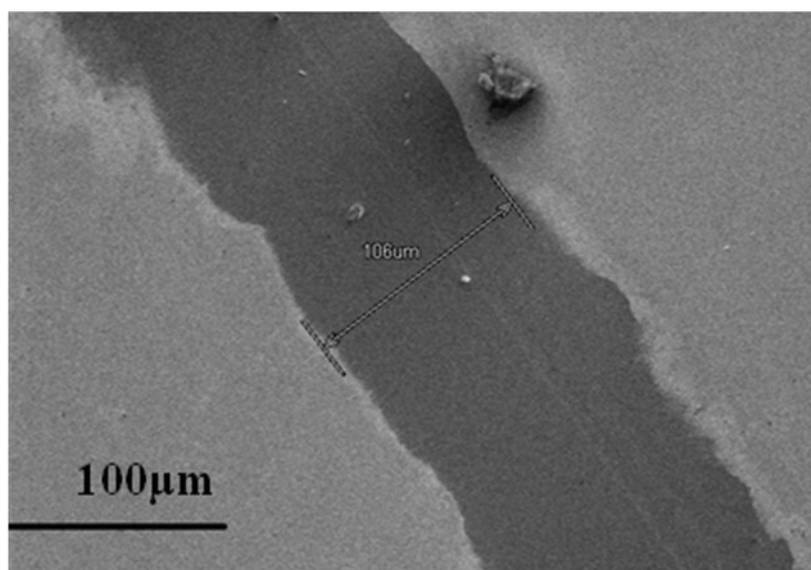

**Fig. S7.** SEM images of bridging-gap

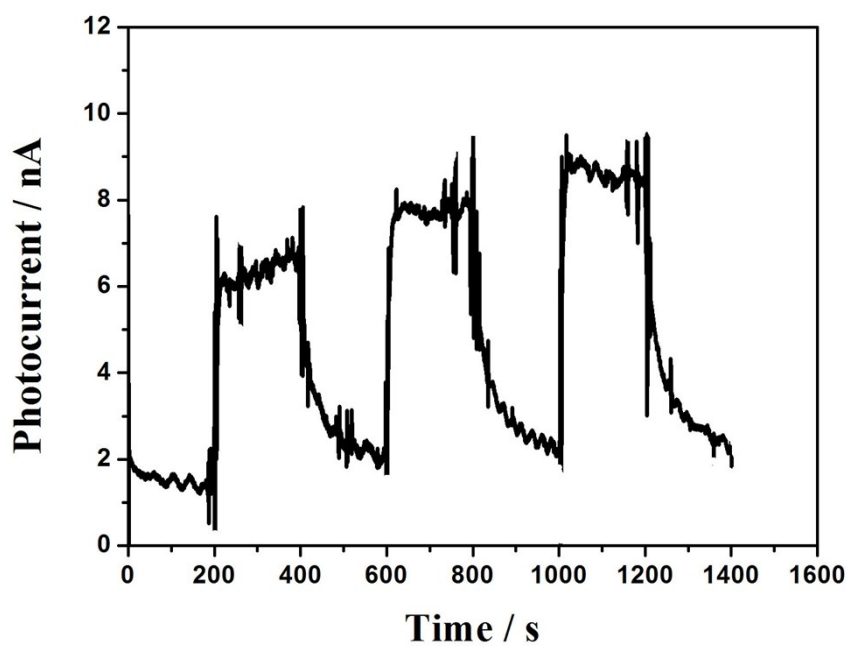

Fig. S8. Photocurrent responses of TiO<sub>2</sub> under Xe lamp irradiation

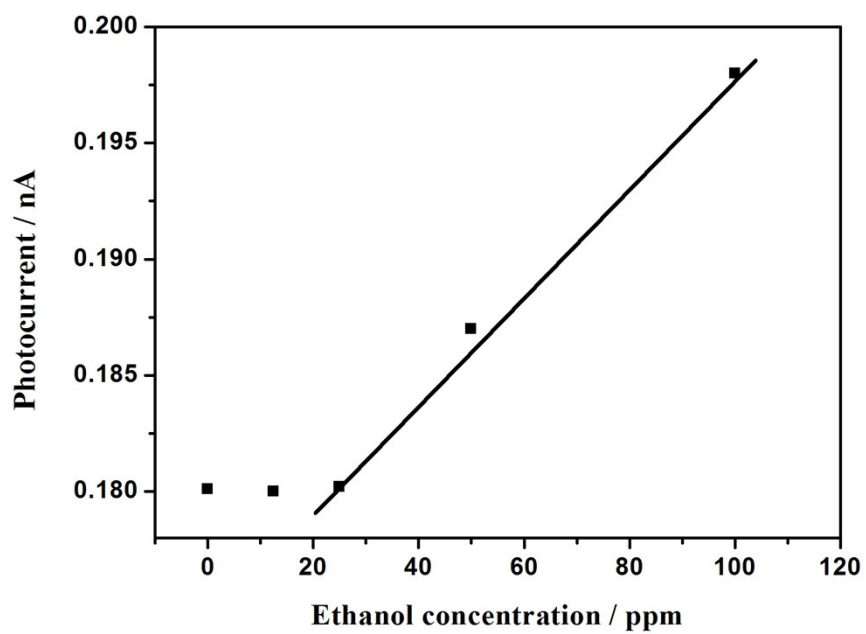

Fig. S9. Photocurrent responses of PW<sub>12</sub> device to ethanol concentration (0-100 ppm)
